# Supplementary material for: Transcriptome Analysis of Spartina pectinata in Response to Freezing Stress
Source: PubMed Central journal article supplement (PMC4816275; doi:10.1371/journal.pone.0152294), 2016-03-31

### Prairie cordgrass freezing tolerance

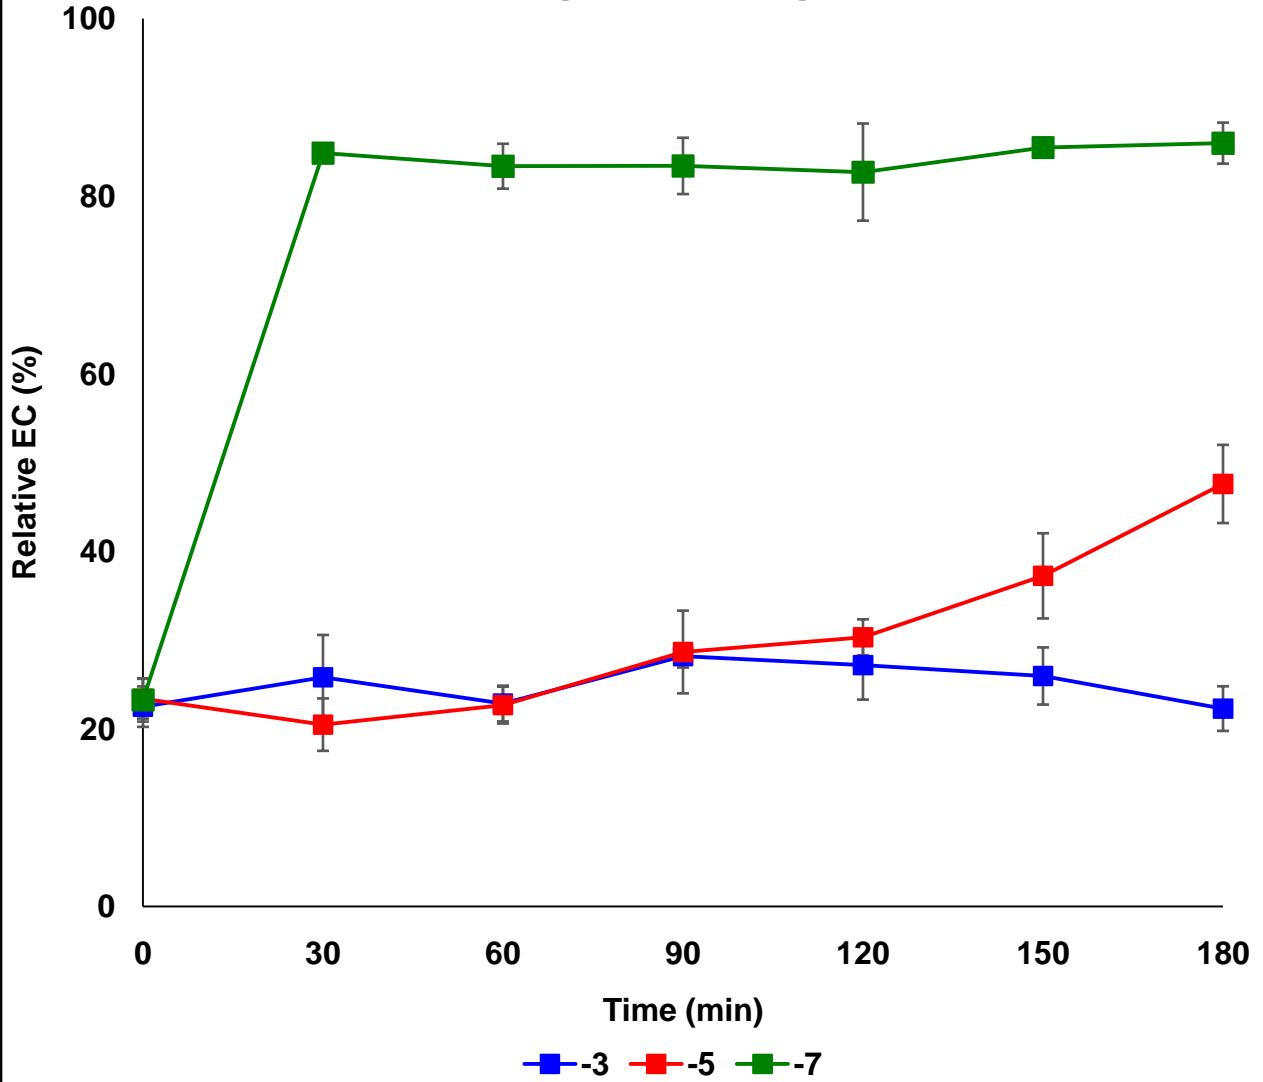

Supplement: pone.0152294.s001.pdf [file pone.0152294.s001.pdf]
