# Supplementary material for: Transcriptome Analysis of Spartina pectinata in Response to Freezing Stress
Source: PubMed Central journal article supplement (PMC4816275; doi:10.1371/journal.pone.0152294), 2016-03-31
Supplement: pone.0152294.s003.pdf [file pone.0152294.s003.pdf]

(A)

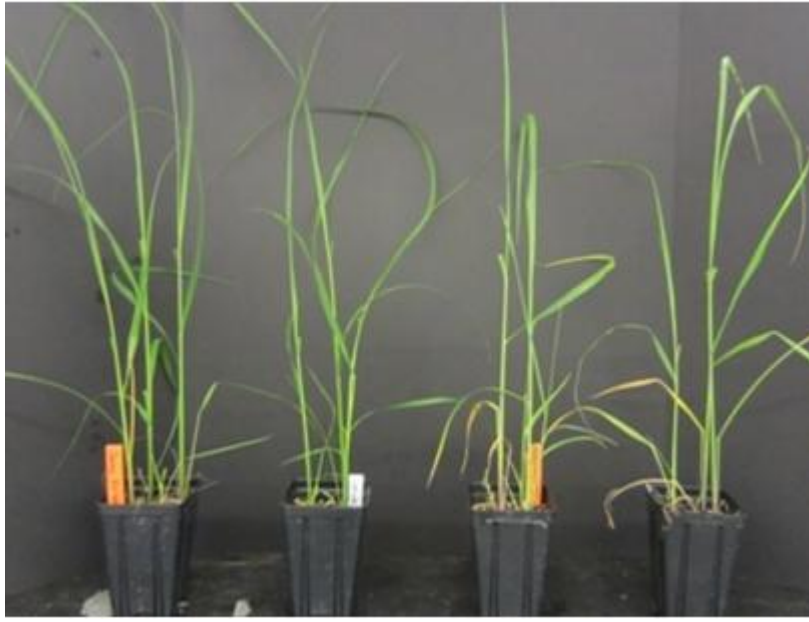

(B)

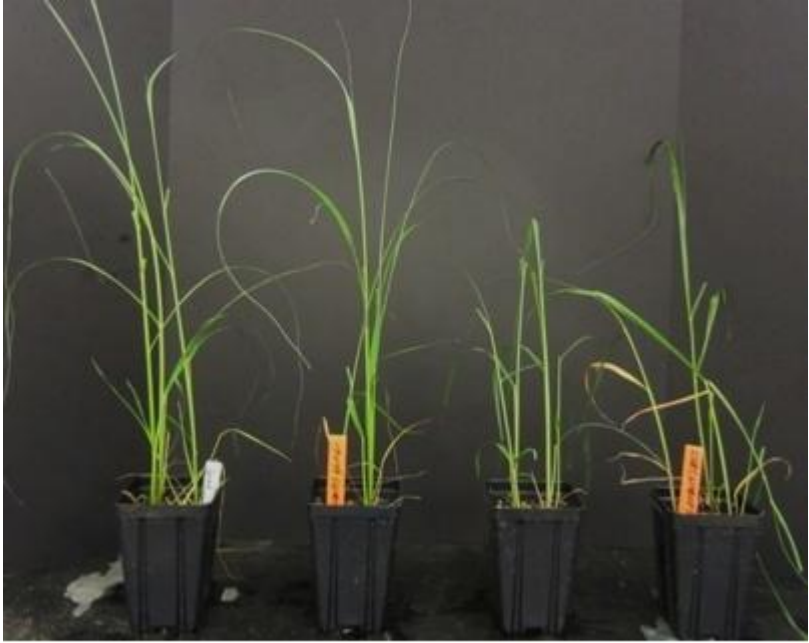

*S. pectinata* "Savory"

*S. pectinata* "17-109"

*P. virgatum* var. "Kanlow"

*P. virgatum* var. "Cave-in-Rock"
